# Supplementary material
Source: PubMed Central journal article supplement (PMC9434484)
Supplement: jamacardiol-e222825-s001.pdf [file jamacardiol-e222825-s001.pdf]

## Supplementary Online Content

Siddiqi HK, Vinayagamoorthy M, Gencer B, et al. Sex differences in atrial fibrillation risk: the VITAL Rhythm Study. *JAMA Cardiol*. Published online August 31, 2022.  
doi:10.1001/jamacardio.2022.2825

**eFigure.** Schematic Showing the Proposed Relationship Between Sex, Anthropometric Measures, and Atrial Fibrillation

**eTable 1.** Baseline and AF Characteristics for Individuals Who Developed Incident AF

**eTable 2.** Sensitivity Analyses for Adjusted Sex-Specific Risk of Incident AF for Females Compared With Males, Restricting to Key Subgroups

This supplementary material has been provided by the authors to give readers additional information about their work.

**eFigure.** Schematic Showing the Proposed Relationship Between Sex, Anthropometric Measures, and Atrial Fibrillation

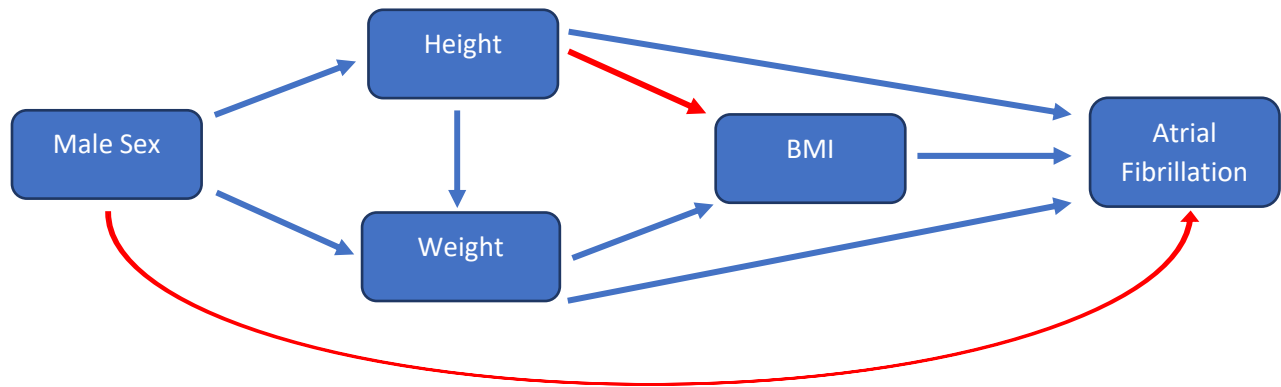

**eFigure legend:** This directed acyclic graph shows the proposed relationship between male sex, anthropometric measures and atrial fibrillation. The red arrows show inverse effects, whereas blue arrows show direct effects. Male sex is associated with a lower direct risk of atrial fibrillation relative to females when accounting for height and weight.

**eTable 1.** Baseline and AF Characteristics for Individuals Who Developed Incident AF

| Characteristic                              | All participants | Male          | Female        |
|---------------------------------------------|------------------|---------------|---------------|
| N (%)                                       | 900              | 495 (55%)     | 405 (45%)     |
| Age, years (SD or N)                        | 74.4 (7.2)       | 73.7 (7.3)    | 75.2 (6.9)    |
| <65                                         | 150 (17%)        | 105 (21%)     | 45 (11%)      |
| 65- <75                                     | 490 (54%)        | 261 (53%)     | 229 (57%)     |
| 75+                                         | 260 (29%)        | 129 (26%)     | 131 (32%)     |
| Race/ethnicity                              |                  |               |               |
| White                                       | 772 (86%)        | 429 (87%)     | 343 (85%)     |
| Black                                       | 52 (6%)          | 19 (4%)       | 33 (8%)       |
| Other/Unknown                               | 76 (8%)          | 47 (10%)      | 29 (7%)       |
| Body mass index, kg/m <sup>2</sup>          | 28.7 (6.34)      | 28.6 (5.2)    | 28.8 (7.5)    |
| Height, inches                              | 68.2 (4.0)       | 70.8 (2.75)   | 64.9 (2.75)   |
| Weight, pounds                              | 189.8 (44.0)     | 204.0 (38.06) | 172.3 (44.62) |
| Body surface area, m <sup>2</sup>           | 2.02 (0.26)      | 2.14 (0.21)   | 1.88 (0.25)   |
| Average Alcohol use                         |                  |               |               |
| Never or <1 drink/week                      | 166 (19%)        | 119 (24%)     | 177 (44%)     |
| 1-6 drinks/week                             | 125 (14%)        | 166 (34%)     | 138 (34%)     |
| 1 drink/day                                 | 304 (34%)        | 78 (16%)      | 47 (12%)      |
| 2+ drinks/day                               | 296 (33%)        | 126 (26%)     | 40 (10%)      |
| Income                                      |                  |               |               |
| <\$50000                                    | 282 (34%)        | 103 (22%)     | 179 (49%)     |
| \$50000 – \$120000                          | 369 (45%)        | 230 (50%)     | 139 (38%)     |
| >\$120000                                   | 170 (21%)        | 126 (28%)     | 44 (12%)      |
| Smoker                                      |                  |               |               |
| Never smoker                                | 400 (45%)        | 211 (44%)     | 189 (48%)     |
| Former smoker                               | 443 (50%)        | 254 (53%)     | 189 (48%)     |
| Current smoker                              | 38 (4.3%)        | 19 (4%)       | 19 (5%)       |
| Diabetes                                    | 123 (14%)        | 82 (17%)      | 41 (10%)      |
| Hypertension                                | 557 (62%)        | 296 (60%)     | 261 (65%)     |
| Thyroid conditions                          | 115 (13%)        | 22 (5%)       | 93 (24%)      |
| Physical exercise, in tertiles by MET hours |                  |               |               |
| Lowest tertile                              | 298 (33%)        | 144 (30%)     | 154 (38%)     |
| Middle tertile                              | 302 (34%)        | 153 (31%)     | 149 (37%)     |
| Highest tertile                             | 292 (33%)        | 191 (39%)     | 101 (25%)     |
| Symptoms at AF diagnosis <sup>a</sup>       | 557 (69%)        | 273 (63%)     | 284 (77%)     |
| Type of AF <sup>b</sup>                     |                  |               |               |
| Paroxysmal AF                               | 526 (60%)        | 267 (56%)     | 259 (65%)     |
| Persistent AF                               | 262 (30%)        | 153 (32%)     | 109 (28%)     |
| Chronic/permanent AF                        | 84 (10%)         | 56 (12%)      | 28 (7%)       |
| Initial Therapy for AF (first month)        |                  |               |               |
| Rate control with medication                | 702 (80%)        | 364 (76%)     | 338 (84%)     |
| Rhythm control with medication              | 227 (26%)        | 128 (27%)     | 99 (25%)      |

|                                                                                                                                                                                                                                                                                                                                                                                                                                                                                                                                                          |           |           |           |
|----------------------------------------------------------------------------------------------------------------------------------------------------------------------------------------------------------------------------------------------------------------------------------------------------------------------------------------------------------------------------------------------------------------------------------------------------------------------------------------------------------------------------------------------------------|-----------|-----------|-----------|
| Maze or AF Ablation                                                                                                                                                                                                                                                                                                                                                                                                                                                                                                                                      | 26 (2.9%) | 15 (3.1%) | 11 (2.7%) |
| Rate Control with AVJ ablation/PPM                                                                                                                                                                                                                                                                                                                                                                                                                                                                                                                       | 4 (0.5%)  | 2 (0.4%)  | 2 (0.5%)  |
| Atrial flutter ablation                                                                                                                                                                                                                                                                                                                                                                                                                                                                                                                                  | 21 (2.4%) | 14 (2.9%) | 7 (1.7%)  |
| Oral anticoagulant prescribed                                                                                                                                                                                                                                                                                                                                                                                                                                                                                                                            | 622 (69%) | 334 (68%) | 288 (71%) |
| <p>eTable 1 legend: Characteristics of the 900 individuals in the VITAL Rhythm study who developed incident AF, stratified by sex.</p> <p><sup>a</sup>Symptoms at AF diagnosis were determined by patient report on paper surveys and/or by medical record review.</p> <p><sup>b</sup>Type of AF was assigned based on cardiologist adjudication of the available medical records for each patient, including medical provider documentation and electrocardiograms</p> <p>Abbreviations: AVJ = atrioventricular junction, PPM = permanent pacemaker</p> |           |           |           |

**eTable 2.** Sensitivity Analyses for Adjusted Sex-Specific Risk of Incident AF for Females Compared With Males, Restricting to Key Subgroups

| Subgroup                                        | Cox-Proportional Hazards Model                                     | Hazard ratio (95% Confidence Interval) | P-value |
|-------------------------------------------------|--------------------------------------------------------------------|----------------------------------------|---------|
| Height 64-68 inches                             | Base model <sup>a</sup> , BMI                                      | 1.19 (0.91, 1.55)                      | 0.21    |
|                                                 | Base model <sup>a</sup> , height, weight                           | 1.57 (1.16, 2.11)                      | 0.003   |
| Age≥55 years                                    | Base model <sup>a</sup> , BMI                                      | 0.73 (0.63, 0.85)                      | <0.0001 |
|                                                 | Base model <sup>a</sup> , height, weight                           | 1.49 (1.21, 1.83)                      | 0.0002  |
| Overall height quintiles                        | Base model <sup>a</sup> , overall height quintiles, weight         | 1.61 (1.30, 2.01)                      | 0.0001  |
| Sex-specific standard score models <sup>b</sup> | Base model <sup>a</sup> , standardized BMI                         | 0.76 (0.66, 0.89)                      | 0.0003  |
|                                                 | Base model <sup>a</sup> , standardized height, standardized weight | 0.78 (0.67, 0.90)                      | 0.0008  |

<sup>a</sup>Base Cox-proportional model adjusted for trial treatment group, age at randomization, race, average alcohol use per day, smoking history, thyroid disease diabetes, hypertension, history of congestive heart failure, weekly leisure time physical activity.

<sup>b</sup>The sex-specific standard score model incorporated BMI or height and weight using sex-specific Z-scores for each of these anthropometric measures.
